# Supplementary material for: Urchin-like hierarchical ruthenium cobalt oxide nanosheets on Ti3C2TxMXene as a binder-free bifunctional electrode for overall water splitting and supercapacitors
Source: Royal Society of Chemistry journal article supplement (doi:10.1039/d1nr07145a), 2021-12-06
Supplement: d1nr07145a1.pdf [file d1nr07145a1.pdf]

## Urchin-like hierarchical ruthenium cobalt oxide nanosheets on $\text{Ti}_3\text{C}_2\text{T}_x$ MXene as binder-free bifunctional electrode for overall water splitting and supercapacitors

Parvin Asen<sup>1</sup> and Ali Esfandiar<sup>1,\*</sup>, H. Mehdipour<sup>2,3</sup>

<sup>1</sup>*Department of Physics, Sharif University of Technology, Azadi Street, 11365-9161, Tehran, Iran*

<sup>2</sup>*Faculty of Physics, University of Duisburg-Essen, Lotharstr. 1, 47057 Duisburg, Germany*

<sup>3</sup>*Department of Chemistry, Amirkabir University of Technology, Tehran, Iran*

*Email: esfandiar@physics.sharif.edu*

**Fig. S1:** Chronoamperometric data for electrodeposition of  $\text{RuCo}_2\text{O}_4$  on  $\text{Ti}_3\text{C}_2\text{T}_x$  MXene@NF electrode

**Fig.S2:** DFT simulation of  $\text{RuCo}_2\text{O}_4/\text{Ti}_3\text{C}_2$  interface

**Fig.S3:** DFT-computed relative total energy of  $\text{RuCo}_2\text{O}_4$

**Fig.S4:** EDS data of  $\text{Ti}_3\text{C}_2\text{T}_x$  on NF electrode

**Fig.S5:** SEM, elemental mapping images and EDS of electrodeposited  $\text{RuCo}_2\text{O}_4$  on  $\text{Ti}_3\text{C}_2\text{T}_x$ @NF at 100 s

**Fig.S6:** SEM, elemental mapping images and EDS of electrodeposited  $\text{RuCo}_2\text{O}_4$  on  $\text{Ti}_3\text{C}_2\text{T}_x$ @NF at 500 s

**Fig.S7:** SEM and EDS analysis of  $\text{RuCo}_2\text{O}_4$ @NF and SEM images of  $\text{Co}_3\text{O}_4/\text{Ti}_3\text{C}_2\text{T}_x$  MXene@NF,  $\text{RuO}_2/\text{MXene@NF}$ ,  $\text{Co}_3\text{O}_4$ @NF,  $\text{RuO}_2$ @NF

**Fig.S8:** LSV curves of  $\text{RuCo}_2\text{O}_4/\text{Ti}_3\text{C}_2\text{T}_x$  MXene@NF electrode towards OER and HER at various deposition time of  $\text{RuCo}_2\text{O}_4$

**Fig.S9:** CV curves of  $\text{Ti}_3\text{C}_2\text{T}_x$  MXene@NF,  $\text{RuO}_2$ @NF,  $\text{RuO}_2/\text{Ti}_3\text{C}_2\text{T}_x$  MXene@NF,  $\text{RuCo}_2\text{O}_4$ @NF,  $\text{Co}_3\text{O}_4$ @NF,  $\text{Co}_3\text{O}_4/\text{Ti}_3\text{C}_2\text{T}_x$  MXene@NF, and  $\text{RuCo}_2\text{O}_4/\text{Ti}_3\text{C}_2\text{T}_x$  MXene@NF at scan rate of  $20 \text{ mV s}^{-1}$

**Fig.S10:** CV curves of  $\text{RuCo}_2\text{O}_4/\text{Ti}_3\text{C}_2\text{T}_x$  MXene@NF at various deposition time of  $\text{RuCo}_2\text{O}_4$

**Table S1:** Fitting data of the Nyquist plots

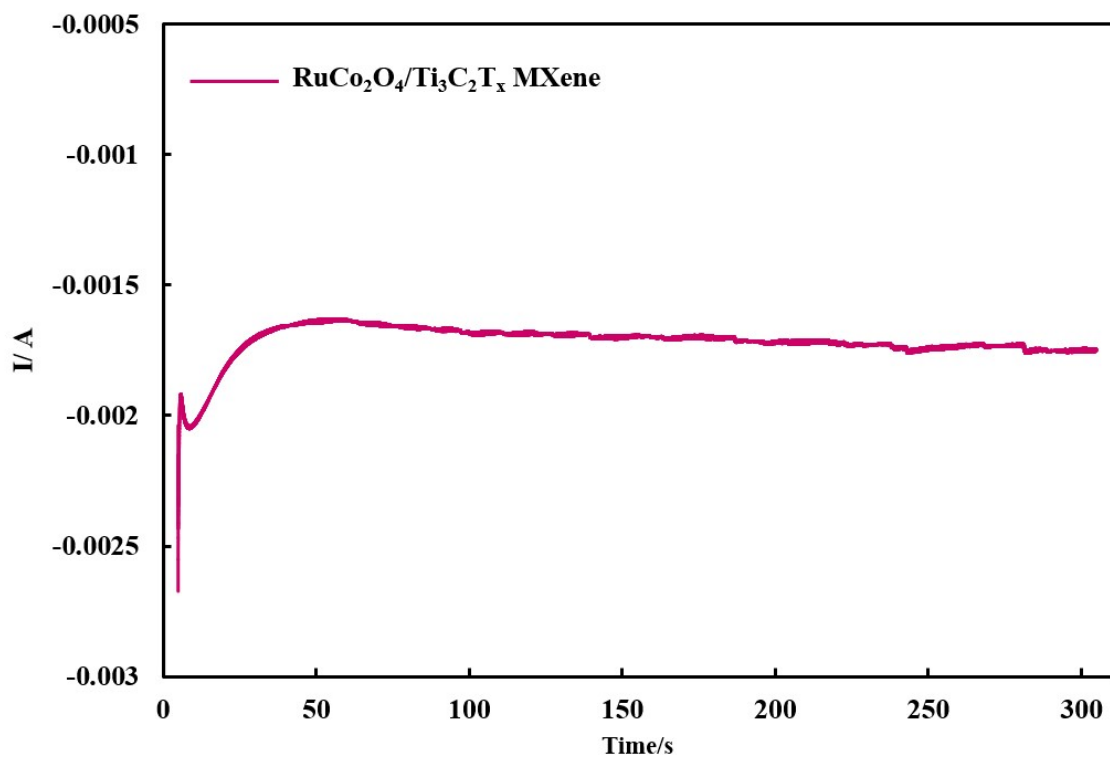

Fig.S1 I-t curve for electrodeposition of RuCo<sub>2</sub>O<sub>4</sub> on Ti<sub>3</sub>C<sub>2</sub>T<sub>x</sub> MXene@NF

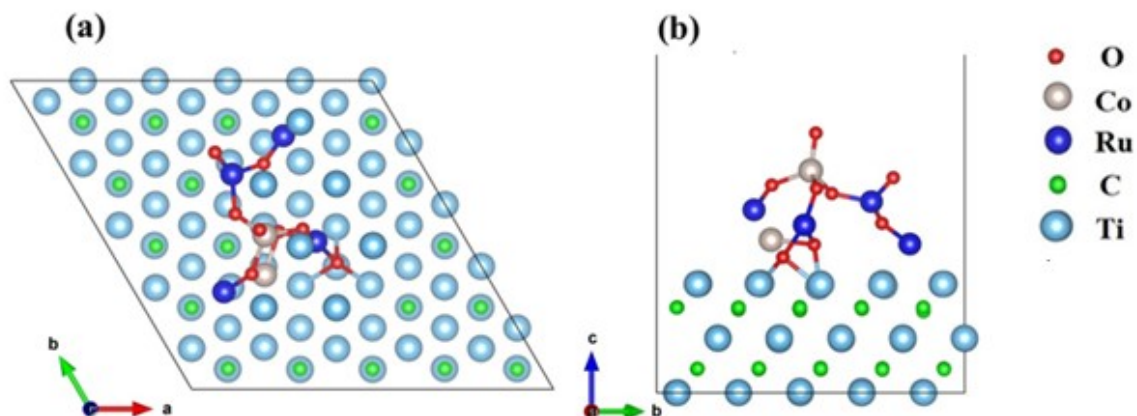

**Fig. S2** DFT model of RuCo<sub>2</sub>O<sub>4</sub>/Ti<sub>3</sub>C<sub>2</sub> interface: plane (a) and side (b) views of relaxed geometries of two-molecule RuCo<sub>2</sub>O<sub>4</sub> cluster on a Ti<sub>3</sub>C<sub>2</sub> (001) surface. Light blue, green, gray, dark blue and red balls represent Ti, C, Co, Ru and O atoms, respectively

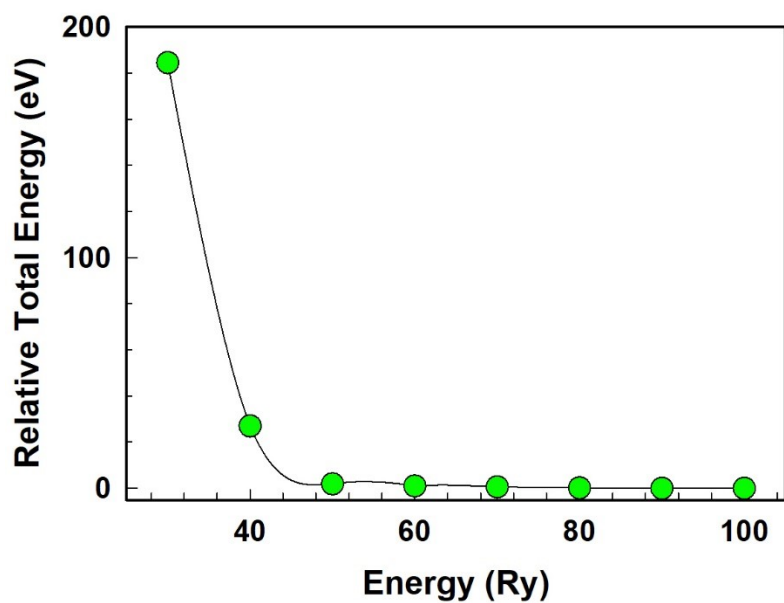

**Fig. S3** Computed relative total energy of RuCo<sub>2</sub>O<sub>4</sub> structure as a function of cut-off energy of expansion of electron wave function. The reference energy is the total energy of the structure for cut-off of 100 Ry.

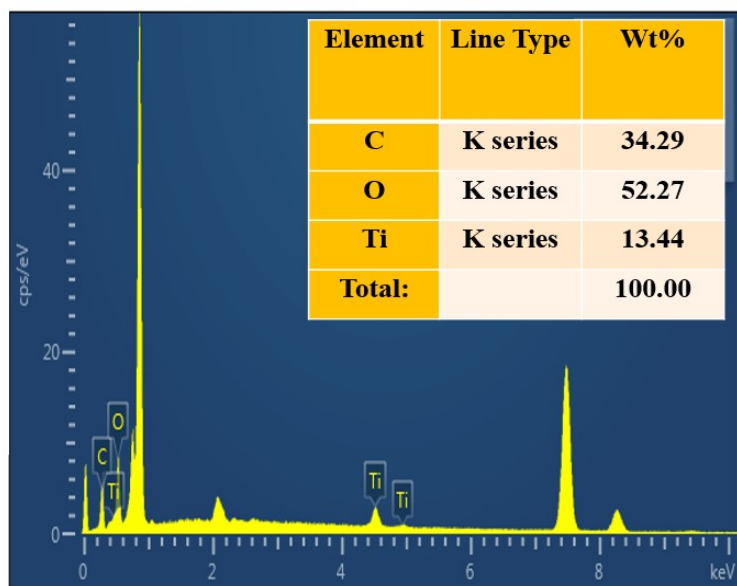

**Fig.S4** EDS analysis of  $Ti_3C_2T_x$  MXene@NF

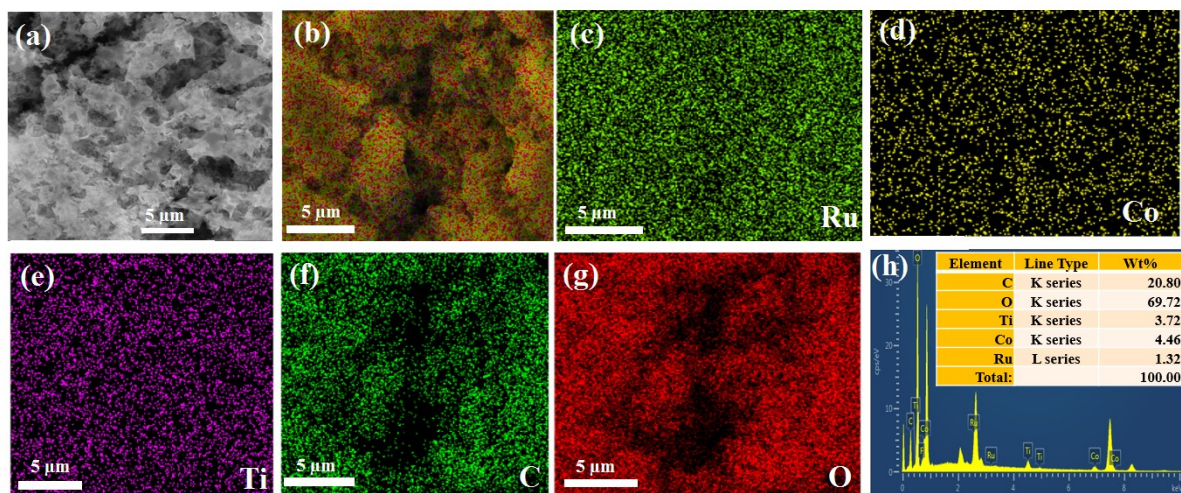

**Fig.S5** (a) SEM image of  $RuCo_2O_4/Ti_3C_2T_x$  MXene@NF at electrodeposition time of 100 s of  $RuCo_2O_4$  on  $Ti_3C_2T_x$  MXene@NF, and (b-h) SEM images and EDS analysis of the fabricated electrode

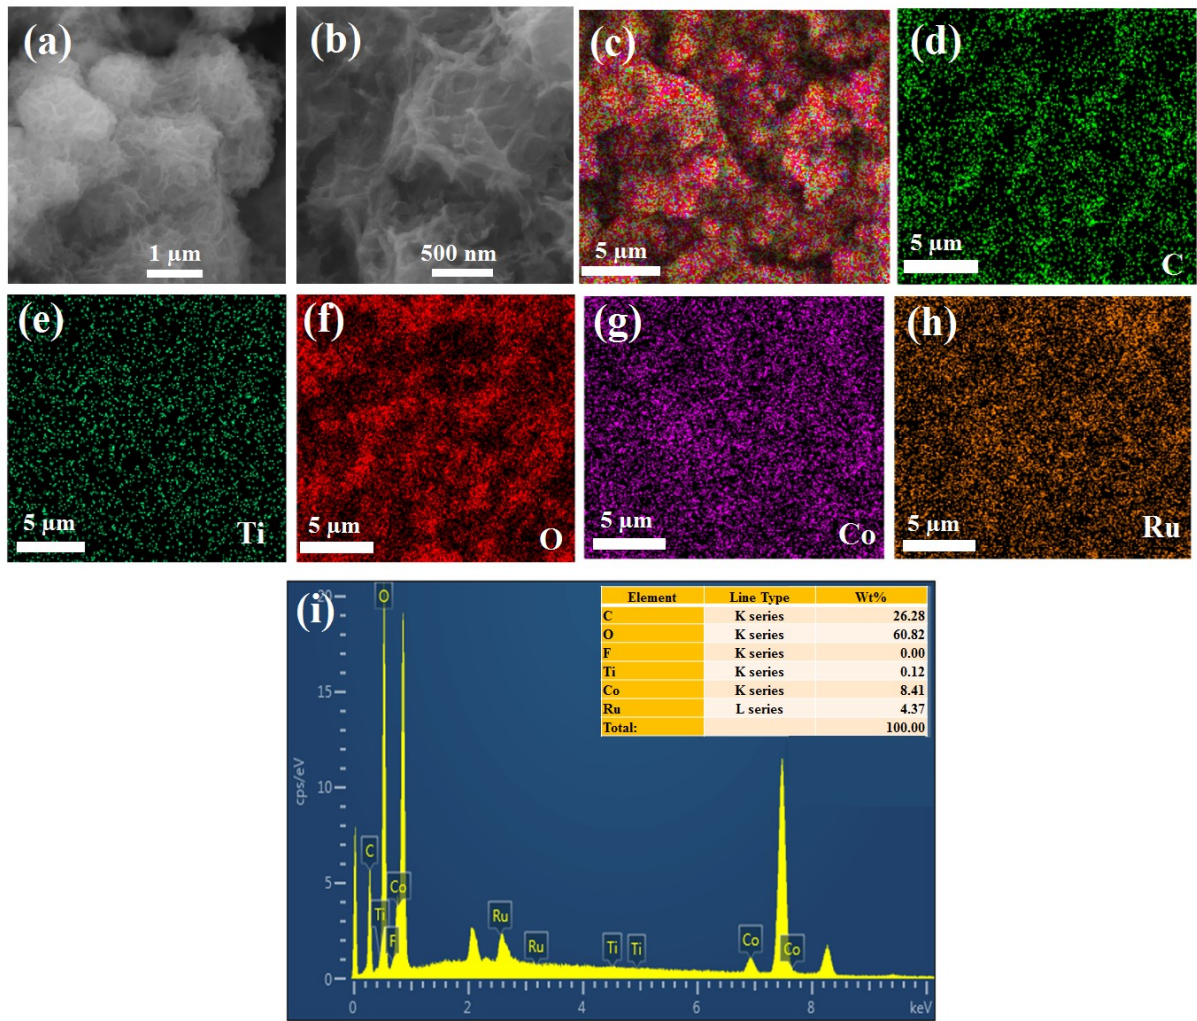

**Fig.S6** (a, b) SEM image of  $\text{RuCo}_2\text{O}_4/\text{Ti}_3\text{C}_2\text{T}_x$  MXene @NF at electrodeposition time of 500 s of  $\text{RuCo}_2\text{O}_4$  on  $\text{Ti}_3\text{C}_2\text{T}_x$  MXene@NF, and (c-i) SEM images and EDS analysis of the fabricated electrode

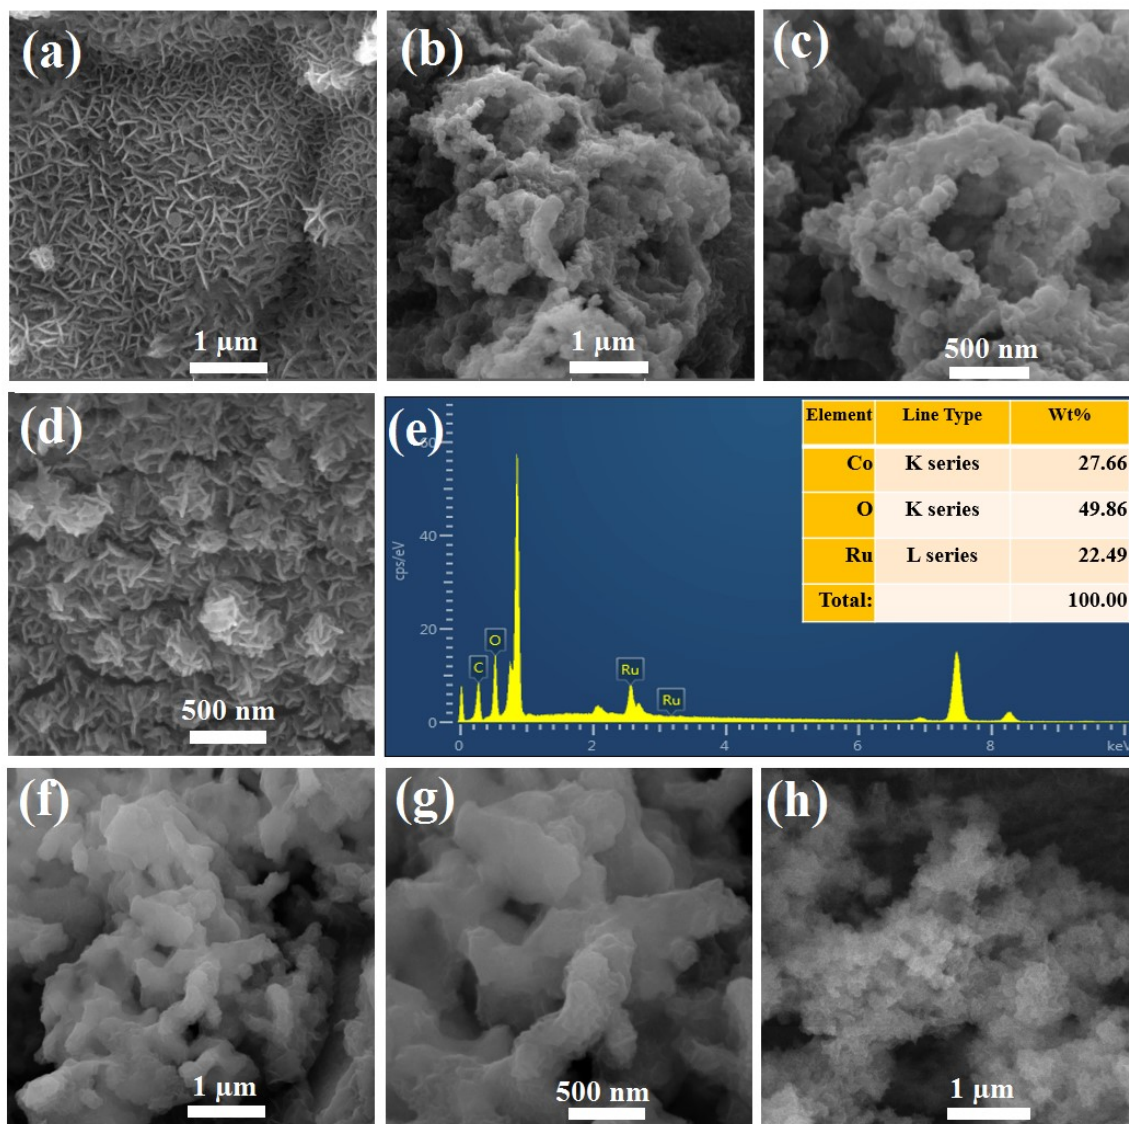

**Fig.S7** SEM images of (a)  $\text{Co}_3\text{O}_4/\text{Ti}_3\text{C}_2\text{T}_x$  MXene@NF, (b,c)  $\text{RuO}_2/\text{Ti}_3\text{C}_2\text{T}_x$  MXene@NF, (d), (e) SEM image and EDS analysis of  $\text{RuCo}_2\text{O}_4$ @NF, (f, g)  $\text{Co}_3\text{O}_4$ @NF and (h)  $\text{RuO}_2$ @NF

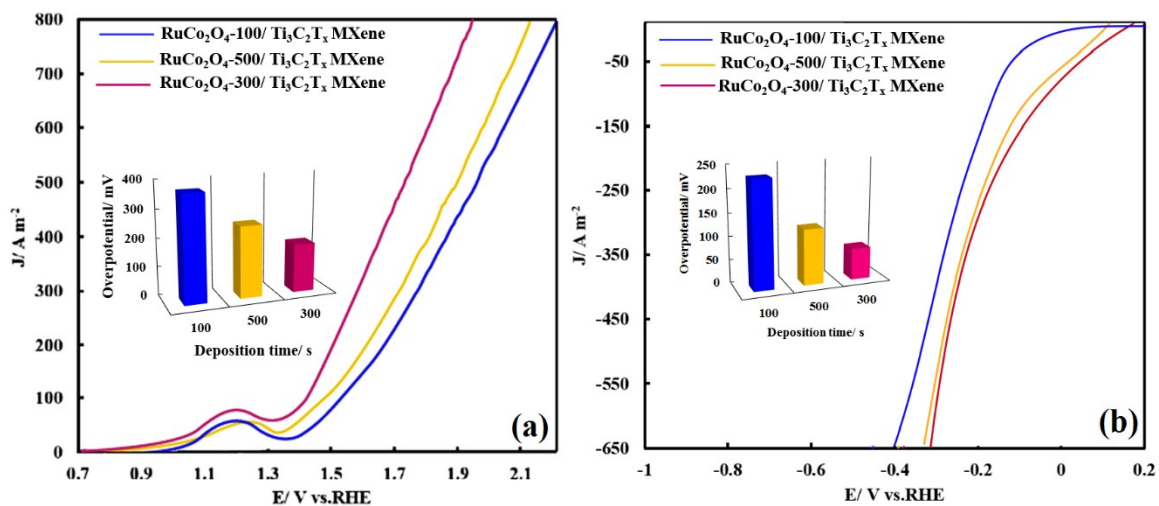

**Fig.S8** (a) OER and (b) HER curves of RuCo<sub>2</sub>O<sub>4</sub>/Ti<sub>3</sub>C<sub>2</sub>T<sub>x</sub> MXene @NF at different electrodeposition times of RuCo<sub>2</sub>O<sub>4</sub> (100, 300 and 500 s) on the Ti<sub>3</sub>C<sub>2</sub>T<sub>x</sub> MXene@NF electrode

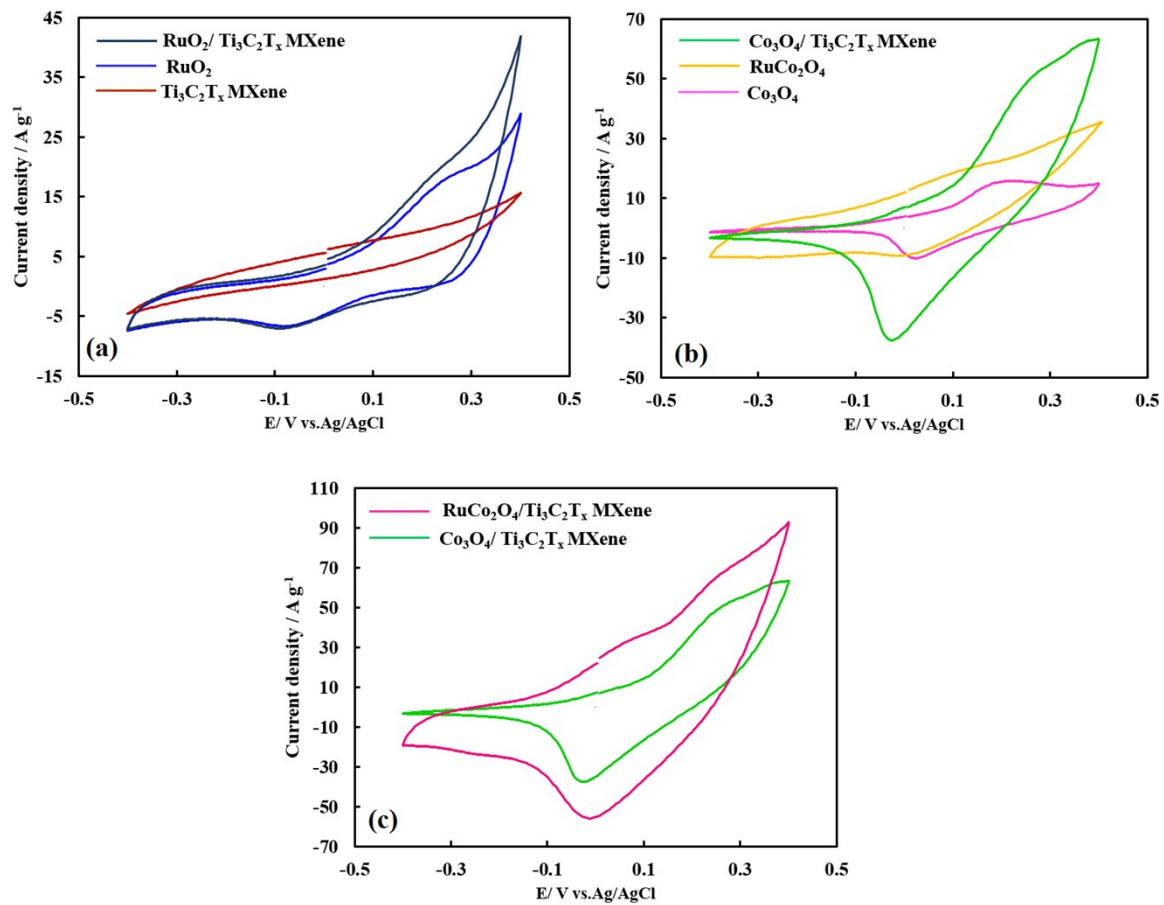

**Fig.S9** CV curves of (a)  $\text{Ti}_3\text{C}_2\text{T}_x$  MXene@NF,  $\text{RuO}_2$ @NF,  $\text{RuO}_2/\text{Ti}_3\text{C}_2\text{T}_x$  MXene@NF, (b)  $\text{RuCo}_2\text{O}_4$ @NF,  $\text{Co}_3\text{O}_4$ @NF,  $\text{Co}_3\text{O}_4/\text{Ti}_3\text{C}_2\text{T}_x$  MXene@NF, (c)  $\text{RuCo}_2\text{O}_4/\text{Ti}_3\text{C}_2\text{T}_x$  MXene@NF,  $\text{Co}_3\text{O}_4/\text{Ti}_3\text{C}_2\text{T}_x$  MXene@NF



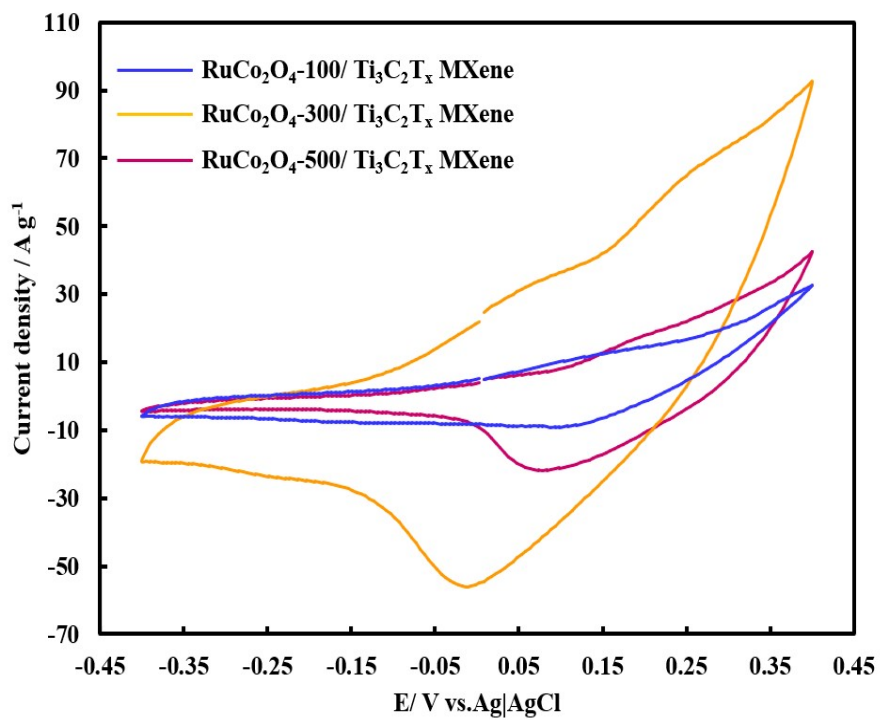

**Fig.S10** CV curves of RuCo<sub>2</sub>O<sub>4</sub>/Ti<sub>3</sub>C<sub>2</sub>T<sub>x</sub> MXene@NF at different electrodeposition times of RuCo<sub>2</sub>O<sub>4</sub> (100, 300 and 500 s) on the Ti<sub>3</sub>C<sub>2</sub>T<sub>x</sub> MXene@NF electrode surface at scan rate of 20 mV s<sup>-1</sup>

**Table S1** Fitting parameters used to simulate the EIS data obtained for prepared electrodes in alkaline media

| <b>Samples</b>                                                                                  | <b>R<sub>s</sub><br/>(<math>\Omega</math>)</b> | <b>R<sub>1</sub><br/>(<math>\Omega</math>)</b> | <b>CPE1<br/>(<math>\Omega^{-1}s</math>)</b> | <b>n1</b> | <b>W</b> | <b>n</b> | <b>CPE2<br/>(<math>\Omega^{-1}s</math>)</b> | <b>n2</b> |
|-------------------------------------------------------------------------------------------------|------------------------------------------------|------------------------------------------------|---------------------------------------------|-----------|----------|----------|---------------------------------------------|-----------|
| <b>RuCo<sub>2</sub>O<sub>4</sub>/<br/>Ti<sub>3</sub>C<sub>2</sub>T<sub>x</sub><br/>MXene@NF</b> | 0.005                                          | 1.2                                            | 2                                           | 0.95      | 0.06     | 0.4      | 1                                           | 0.4       |
| <b>RuO<sub>2</sub>/<br/>Ti<sub>3</sub>C<sub>2</sub>T<sub>x</sub><br/>MXene@NF</b>               | 0.67                                           | 2                                              | 0.18                                        | 0.65      | 0.06     | 1        | 1.3                                         | 0.8       |
| <b>Co<sub>3</sub>O<sub>4</sub>/<br/>Ti<sub>3</sub>C<sub>2</sub>T<sub>x</sub><br/>MXene@NF</b>   | 0.005                                          | 4                                              | 0.6                                         | 0.8       | 0.02     | 0.39     | 0.4                                         | 0.7       |
| <b>RuCo<sub>2</sub>O<sub>4</sub>@NF</b>                                                         | 0.5                                            | 4                                              | 0.62                                        | 0.81      | 0.02     | 0.5      | 0.15                                        | 0.6       |
| <b>Co<sub>3</sub>O<sub>4</sub>@NF</b>                                                           | 1                                              | 8                                              | 0.61                                        | 0.83      | 0.02     | 0.35     | 0.6                                         | 0.8       |
| <b>RuO<sub>2</sub>@NF</b>                                                                       | 1                                              | 45                                             | 0.05                                        | 0.8       | 0.009    | 0.34     | 7                                           | 0.4       |
| <b>Ti<sub>3</sub>C<sub>2</sub>T<sub>x</sub><br/>MXene@NF</b>                                    | 1                                              | 75                                             | 0.03                                        | 0.8       | 0.002    | 0.3      | 15                                          | 0.4       |
